# Supplementary material for: Preparation, activity and mechanism of a metallic Cu/TiO2 nanotube array catalyst by a fast solar drying method for photothermal CO2 reduction under concentrating light
Source: Royal Society of Chemistry journal article supplement (doi:10.1039/d4cy00175c), 2024-01-01
Supplement: d4cy00175c1.pdf [file d4cy00175c1.pdf]

# Preparation, activity and mechanism of metallic Cu/TiO<sub>2</sub> nanotube arrays catalyst by fast solar drying method for photothermal CO<sub>2</sub> reduction

Zekai Zhang\*, Wei Yan, Ying Wang, Guokai Cui, Hanfeng Lu\*

Institute of Chemical Reaction Engineering, College of Chemical Engineering, Zhejiang

University of Technology, Chaowang Road 18, Hangzhou 310014, China

Table S1 Some collected CO<sub>2</sub> photoreduction reaction rate data of TNTAs

| Catalysts                                                 | Preparation method                             | Light source     | Reducing agent   | Reaction parameters                      | Main product                                                                                                                                                                                |
|-----------------------------------------------------------|------------------------------------------------|------------------|------------------|------------------------------------------|---------------------------------------------------------------------------------------------------------------------------------------------------------------------------------------------|
|                                                           |                                                |                  |                  |                                          |                                                                                                                                                                                             |
| Pt/TiO <sub>2</sub> NTAs [1]                              | Rapid microwave-assisted solvothermal approach | AM 1.5G sunlight | H <sub>2</sub> O | Gas phase<br><br>1.0psi; 43±3°C          | CH <sub>4</sub><br><br>$36\pm6\mu\text{L} \cdot \text{g}^{-1} \cdot \text{h}^{-1}$                                                                                                          |
| CdS(Bi <sub>2</sub> S <sub>3</sub> )/TiO <sub>2</sub> [2] | Hydrothermal and direct precipitation          | 500W Xe lamp     | H <sub>2</sub> O | Liquid phase<br><br>RT(Room temperature) | CH <sub>3</sub> OH<br><br>159.5 and 224.6<br>$\mu\text{mol} \cdot \text{L}^{-1}$ after 5h.                                                                                                  |
| TiO <sub>2</sub> NTAs [3]                                 | Electrochemical anodization                    | -                | H <sub>2</sub> O | Liquid phase<br><br>RT(Room temperature) | CH <sub>3</sub> OH<br><br>$10\text{ nmol} \cdot \text{cm}^{-2} \cdot \text{h}^{-1}$<br><br>C <sub>2</sub> H <sub>5</sub> OH<br><br>$9\text{ nmol} \cdot \text{cm}^{-2} \cdot \text{h}^{-1}$ |
| V, N co-doped TiO <sub>2</sub>                            | combination of                                 | 300-W Hg lamp    | H <sub>2</sub> O | Gas phase                                | CH <sub>4</sub>                                                                                                                                                                             |

|                                                  |                                                                            |                                                                |                  |                                                                                                   |                                                                                                  |
|--------------------------------------------------|----------------------------------------------------------------------------|----------------------------------------------------------------|------------------|---------------------------------------------------------------------------------------------------|--------------------------------------------------------------------------------------------------|
| nanotube arrays [4]                              | electrochemical<br><br>anodization<br><br>and hydrothermal<br><br>reaction |                                                                |                  | RT(Room<br><br>temperature)                                                                       | $64.5 ppm \cdot cm^{-2} \cdot h^{-1}$                                                            |
| CuO/ TiO <sub>2</sub> nanotube<br><br>arrays [5] | anodization and<br><br>electrodeposition                                   | 250W Xe lamp                                                   | H <sub>2</sub> O | Liquid phase<br><br>RT(Room<br><br>temperature)                                                   | CH <sub>3</sub> OH<br><br>$8.3 \mu mol \cdot cm^{-2} \cdot h^{-1}$                               |
| TiO <sub>2</sub> nanotube arrays<br><br>[6]      | Flame annealing                                                            | 50 W LED lamp;<br><br>AM 1.5 G, 100<br><br>mW cm <sup>-2</sup> | H <sub>2</sub> O | Liquid phase<br><br>RT(Room<br><br>temperature)                                                   | CH <sub>4</sub><br><br>$156.5 \mu mol \cdot g^{-1} \cdot h^{-1}$                                 |
| Am TNTAs [7]                                     | Anodization                                                                | 6 UV-light bulbs,<br><br>each 16W                              | H <sub>2</sub> O | Liquid phase<br><br>RT(Room<br><br>temperature)                                                   | CH <sub>4</sub><br><br>$14.0 \mu mol \cdot g^{-1} \cdot h^{-1}$                                  |
| TiO <sub>2</sub> nanotube arrays<br><br>[8]      | Anodization                                                                | 3 A-UV diodes                                                  | H <sub>2</sub> O | Liquid phase<br><br>RT(Room<br><br>temperature)                                                   | CH <sub>4</sub><br><br>About 14<br><br>$nmol \cdot m^{-2} \cdot h^{-1}$                          |
| CQD-modified<br><br>TiO <sub>2</sub> NTs [9]     | Anodization                                                                | 300W Xe lamp                                                   | H <sub>2</sub> O | Liquid phase<br><br>10mL TEOA<br><br>and 20mL H <sub>2</sub> O<br><br>RT(Room<br><br>temperature) | CO and CH <sub>4</sub> yields of 2.71<br><br>and 0.71<br><br>$\mu mol \cdot g^{-1} \cdot h^{-1}$ |
| Cu <sub>2</sub> O-loaded TiO <sub>2</sub>        | Andoization                                                                | 300 W Xe lamp                                                  | H <sub>2</sub> O | Gas phase                                                                                         | CH <sub>3</sub> OH                                                                               |

|                            |                                                  |                                                                                                  |                  |                                                             |                                                                                 |
|----------------------------|--------------------------------------------------|--------------------------------------------------------------------------------------------------|------------------|-------------------------------------------------------------|---------------------------------------------------------------------------------|
| nanotube arrays [10]       |                                                  |                                                                                                  |                  | RT(Room temperature)                                        |                                                                                 |
| CN-TNTs [11]               | Anodization and solid-state thermal condensation | Newport Class A solar simulator (AM 1.5 G one sun with an intensity of 100 mW cm <sup>-2</sup> ) | H <sub>2</sub> O | aqueous solution of triethanolamine<br>RT(Room temperature) | CO<br>14.97 $\mu\text{mol} \cdot \text{g}^{-1} \cdot \text{h}^{-1}$             |
| Cu+/ TiO <sub>2</sub> [12] | Anodization                                      | Xe lamp with intensity of 136 mW cm <sup>-2</sup>                                                | H <sub>2</sub> O | Gas phase<br>150 °C                                         | CH <sub>4</sub><br>1.52 $\mu\text{mol} \cdot \text{g}^{-1} \cdot \text{h}^{-1}$ |

## Detailed Experimental methods

### **Preparation of TiO<sub>2</sub> NTAs supported Cu nanoclusters catalysts**

TiO<sub>2</sub> NTAs was prepared with classic anodization method. [32] The anodization device mainly contains a DC power and a thermostatic water bath. The Ti foil (purity>99.9%) was cut into 2.5\*2.5\*0.2 mm square pieces, then it was smoothed by the sandpaper, cleaned by ultrasonic with deionized water, ethanol and acetone for 15 min to remove the impurities. After ultrasound, the titanium sheet was put into the polishing liquid for about 3 min, and then taken out and cleaned with ethanol. The polishing liquid contains 10 mL of distilled water, 5 mL of concentrated nitric acid, 1 mL of 18 wt% NH<sub>4</sub>F, 1 mL of 18% wt ammonia. After polishing, anodization was performed. A titanium foil is clamped on the anode, and a Pt sheet with the same size is used as an inert electrode. The position of the two electrodes should be adjusted to face each other and put together into the electrolyte. The electrolyte contained 0.3 g of NH<sub>4</sub>F, 2 mL of deionized water, and 100 mL ethylene glycol. The DC voltage of anodization was adjusted to 50 V, and the electrolyte temperature was 45°C, and anodization was performed for about 25min. After anodization, it was cleaned in acetone and ethanol solution by sonication for 3 min and dried. The resulting mass of each TiO<sub>2</sub> nanotube arrays mass is around 0.01 g.

The procedure of Cu nanoclusters is following chemical reduction method. 0.5 g of polyvinylpyrrolidone was dissolved in 8 mL ultrapure water to form a solution. 1mL Cu(NO<sub>3</sub>)<sub>2</sub> solution (1mol/L) and 1.76 g of ascorbic acid was sequentially added into the solution with stirring. Subsequently, the pH of the solution was adjusted to about 4.0, and placed in a constant temperature water bath pot with temperature 75 °C for different times to obtain Cu nanoclusters with different sizes (from 1nm, 3nm, 5nm to 7nm). The copper nanoclusters solution is stored at 4 °C for further experiments.

## **Detailed illustration of the home-made concentrating light reactor system**

The home-made concentrating light systems can be seen in Figure S1 and S2. It is necessary to describe the reactor system in detail here, as a photoreactor is often a nonstandard equipment, especially for the photothermal reactor systems. At present, the reported reactor systems for the photothermal catalysis are generally divided into two genres. One is based on the original kettle reactor system, where a functional jacket is changed from being used to heat perseveration to heating. The system is generally carried out in liquid phase and the catalyst dispersed uniformly in the reactor, leading to a CSTR. The degree of heating is limited, because high temperature easily vaporizes the water and hinder the light transmission. The decay of light will be more serious with temperature rising. The other is based on the heterogenous thermal catalytic reactor, and a hole is dug on the wall of reactor and furnace so that the light beam can pass through. This reactor system can be heated to very high temperatures, and the reaction can take place in the gas phase. The problem is that the diameter of the hole is limited, and the catalyst is filled into the reactor in the form of a fixed bed, and the depth of penetration of light is needed to consider. Meanwhile, all the heat sources are from external. Our self-made photothermal reaction systems are somewhat different from the existing reaction systems. The heat resource is from the light conversion. In other words, we use concentrating light technology to concentrate a certain area range of light rays into a small area, which can get an enhanced light input, and also increase the temperature in the zone. This system is born from the thermocatalytic fixed-bed reaction system, the difference is

that it uses concentrated light as the source of energy driving force. At the same time, in order to be able to better receive the light, its reactor is kettle-type, and there is a light receiving window at the top of the kettle reactor. It's like a combination of two existing reaction systems, taking the reactor of one of the systems, and the other parts of the other system. Of course, in order to effectively increase the temperature in the reactor, we also increased the output power of the light source and added a concentrator component. Just as shown in Figure S1, the only different part from the thermocatalytic reaction system, a patio is opened on the left part of the system. From top to down, a 1000W light source is fixed at the top, and a Fresnel lens was settled under the light source, and a kettle reactor was put under the Fresnel lens. Both the site reactor and the lens can be adjusted up and down to obtain a different concentrating ratio.

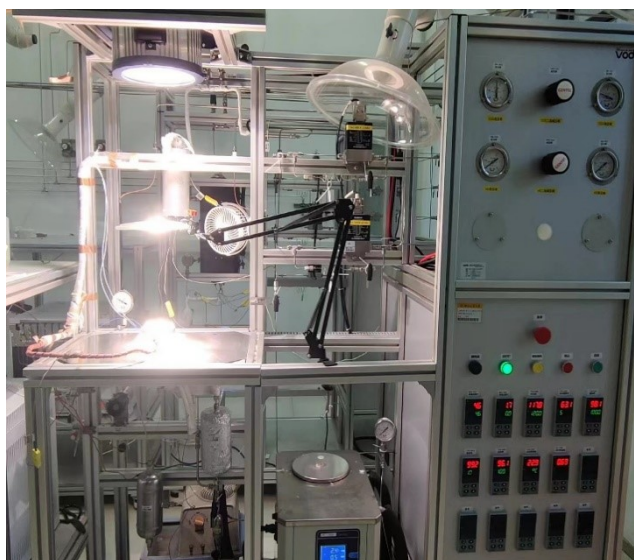

Figure S1 The picture of the indoor reactor system with simulated light source

The Fresnel lens is made of PMMA and the reactor is made of stainless steel

with a quartz glass window at the top to receive the incident light. The diameter of the light source is about 20 cm, and the Fresnel lens diameter is about 20 cm too. The diameter of the window is about 8 cm. The volume of the reactor is 100 mL. The intensity of the light source is about  $220 \text{ mW/cm}^2$  before concentrating. Since the light will form a spot of different sizes after concentrating, in order to well receive the light, the catalyst is pressed or trimmed into a round disc, the light shines on the upper surface of the catalyst disc. It is some kind of a fixed bed reactor, which is not the same as the traditional kettle type CSTR, where catalyst is often dispersed in aqueous solution, although it can be done the same way here. Depending on the concentrating degree, the light spot size will change, and the size of the catalyst disc can also change correspondingly. For convenient, the degree of light concentration can be expressed in terms of a light concentration ratio (CR), which is defined as the ratio of the incident area of the light source to the area of the catalyst disc.

Unlike the simulated light sources, which can be fixed at certain site, nature solar light from the sun moves all times of a day. The distance between solar light and the Fresnel lens is not changed, so what can be adjusted is the distance from the reactor to the Fresnel lens, which can adjust the concentration ratio. In order to ensure that solar light is vertically towards the Fresnel lens surface and reactor, not only does a sensor need to sense the solar light movement in direction, but also some power devices are needed to move and fine tune the lens and reactor. As shown in Figure S2, a framework fixed the Fresnel lens and the reactor together, and a solar light sensor is also fixed on the framework, two motors are equipped to provide the force to move

the framework attitude according to the guideline of the sensor.

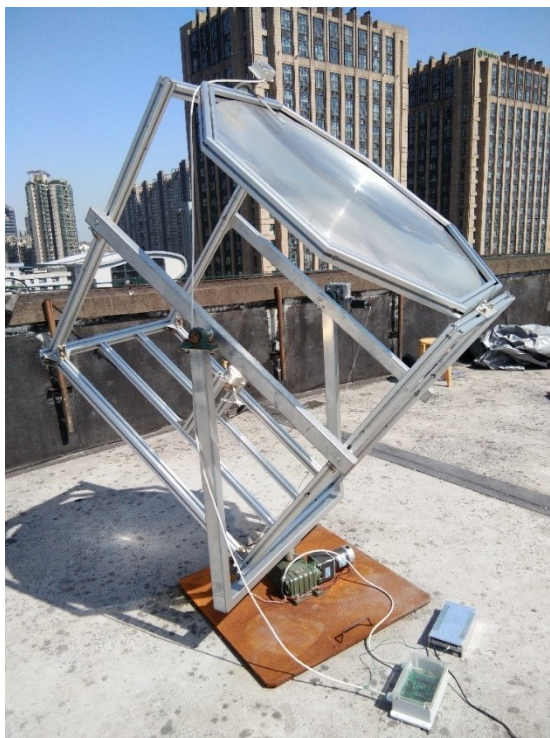

Figure S2 The picture of the outdoor reactor system with nature solar light source

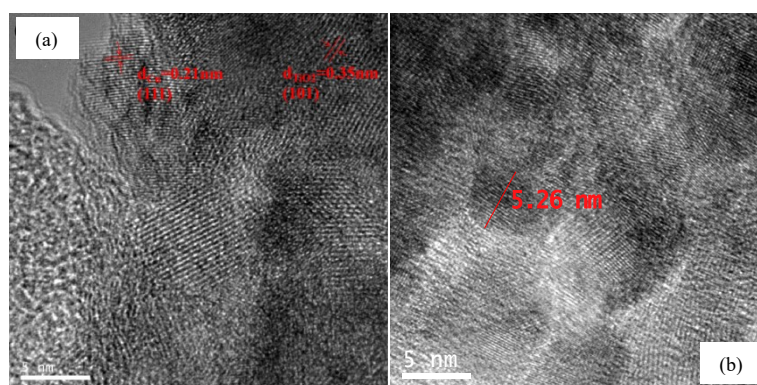

Figure S3 TEM images of fresh Cu/TiO<sub>2</sub> NTAs catalysts with different size of Cu nanoclusters. a) 3 nm; b) 5 nm

**CO<sub>2</sub> content effect on the activity of Cu<sub>1nm</sub>/TiO<sub>2</sub> NTAs under 1000 W Xe light**

As the main reactants, CO<sub>2</sub> and H<sub>2</sub>O content and ratio also may have effect on the reaction rate. Therefore, the photocatalytic reduction of CO<sub>2</sub> activity on Cu<sub>1nm</sub>/TiO<sub>2</sub> NTAs at different water and CO<sub>2</sub> content with the same concentrating ratio (CR 16) was evaluated too.

CO<sub>2</sub> contents were set at 0.05 MPa, 0.1 MPa, 0.2 MPa, respectively. In Figure S4, it can be seen that either higher or lower of CO<sub>2</sub> contents is not favorable for the hydrocarbons yield. When charged with 0.05 MPa CO<sub>2</sub>, the total yield is about 375  $\mu\text{mol} \cdot \text{g}^{-1}$  after 3 h reaction; when charged with 0.2 MPa CO<sub>2</sub>, the total yield is about 121  $\mu\text{mol} \cdot \text{g}^{-1}$  after 3 h reaction. Both of them are lower than the yield of 570  $\mu\text{mol} \cdot \text{g}^{-1}$ , charged with 0.1 MPa CO<sub>2</sub>. The result is reasonable, according to the reaction rate equation. More interestingly, the content also influences the product distribution, at 0.1 MPa, there are more ethene and ethane formed.

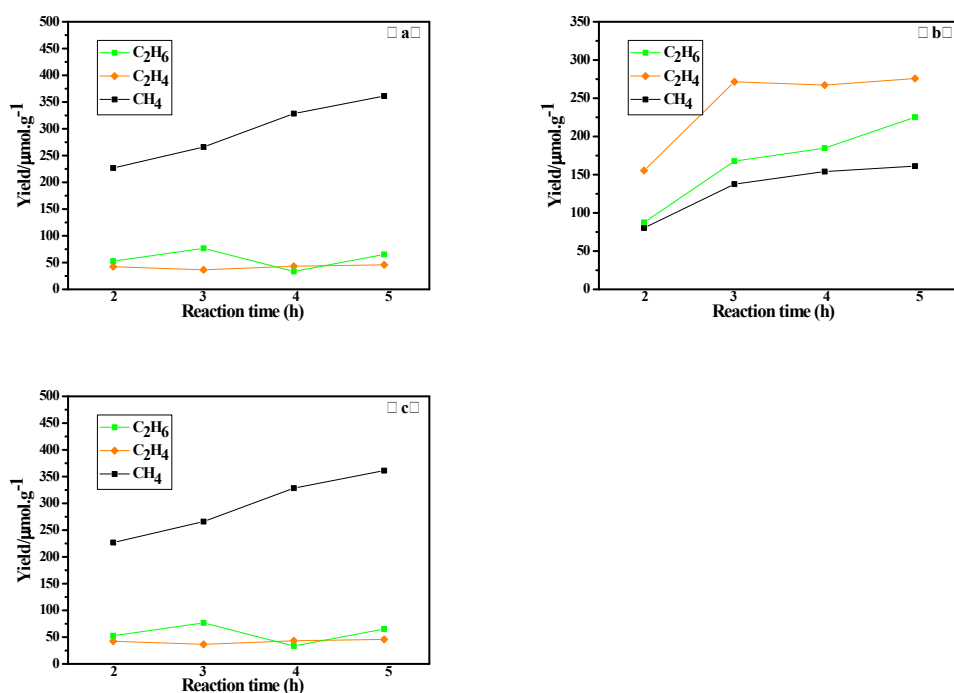

Figure S4 Yield of products on Cu<sub>1nm</sub>/TiO<sub>2</sub> NTAs catalyst at different CO<sub>2</sub> contents (a)

0.05 MPa, (b) 0.1 MPa, (c) 0.2 MPa (CR 16; 2 mL H<sub>2</sub>O)

**Water content effect on the activity of Cu<sub>1nm</sub>/TiO<sub>2</sub> NTAs under 1000 W Xe light**

H<sub>2</sub>O contents were set at 0.5 mL, 1.0 mL, 2 mL and 3 mL. The results are in Figure S5. At 1 mL of water, the total yield of the product was the highest, at 2644.37  $\mu\text{mol} \cdot \text{g}^{-1}$ , and the content of ethane was relatively large, which was 743.8  $\mu\text{mol} \cdot \text{g}^{-1}$ . At 2 mL of water, the production of ethylene and ethane products predominated, but the overall yield is lower than from 1 mL of water, which means that high water content is favorable for the formation of high hydrocarbons. Further, too much water is also not conducive to the formation of C<sub>2</sub> hydrocarbon products. The proportion of C<sub>2</sub> hydrocarbon products decreases significantly at a water volume of 3 mL. In general, at the time of the concentrator ratio, the change of water volume has a greater impact on the distribution of products, and not surprisingly, it also roughly corresponds to the characteristics of reaction kinetics.

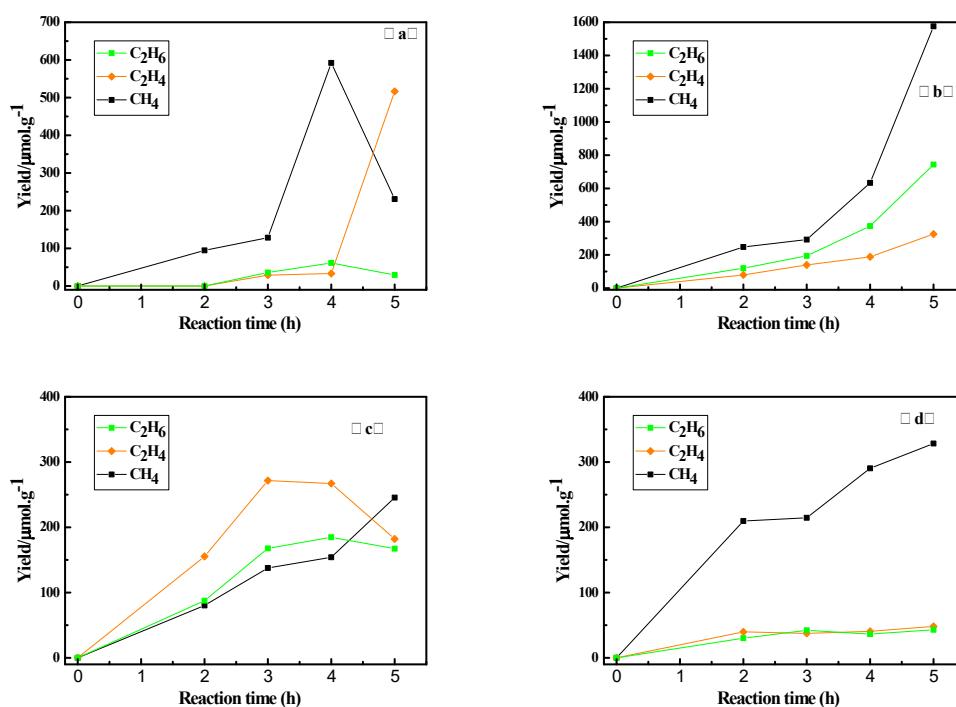

Figure S5 Yields of products on Cu<sub>1nm</sub>/TiO<sub>2</sub> NTAs catalyst with different amounts of H<sub>2</sub>O. (a) 0.5 mL (b) 1 mL, (c) 2 mL, (d) 3 mL (CR 16; CO<sub>2</sub> 0.1MPa)

## Reaction kinetics and influence of reaction conditions

Nowadays, people are generally more concerned with the catalyst and its function mechanism, that is, what provides the high performance of the catalyst, but here we have to first analyze and strip out the influence of the reaction conditions, only then the relation between the structure and performance can be discussed conveniently.

The effect of reaction environment and reaction conditions is still a very complex to distinguish as it includes the light intensity, the temperature, the pressure and the semiconductor. Fortunately, it can be reflected easily by reaction kinetics equation. It is known that the common reaction rate equation for CO<sub>2</sub> photoreduction

$$-r_{CO_2} = kl^\alpha \frac{P_{H_2O} P_{CO_2}}{(1 + K_2 P_{H_2O} + K_6 P_{CO_2})^2} \quad (1)$$

However, for concentrating solar light technology, there are more problems. The reaction order of light intensity  $\alpha$  is decreasing with light intensity, which actually make the constant to be a variable factor. In particular, concentrating light will cause a Gaussian distribution of light intensity on the catalyst disc. The light intensity is the highest at the center of the catalyst, and decreases from center to around. It will almost be an impossible task to determine the  $\alpha$  under different concentrating ratio without further consideration.

It is known that light is not a material and often treated as an energy. When the light participants into a reaction, it will work together with phonons of heat and form the “photothermal effect”. That is why is very hard to separate the general photothermal effect to “photo- effect” and “thermal effect” respectively. However, if the photon is treated as a reactant, the adsorption of photons on the active sites and the

recombination of electron-hole pairs could be analogue to be the adsorption/desorption process of a reactant on the catalyst surface.

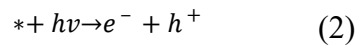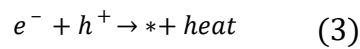

Then according to the Langmuir adsorption theory, an adsorption isotherm equation will be obtained. The only thing is to consider it as a dissociative adsorption or non-dissociative adsorption. The reason to consider it as a non-dissociative adsorption is that one photon only can be transformed into one electron, while as a dissociative adsorption is that adsorption of one photon yields an electron and a hole at the same time. Nonetheless, according to the hypothesis, there would have

$$C_{e^-} = \frac{K_I I}{1 + K_I I} \quad \text{or} \quad C_{e^-} = \frac{K_I \sqrt{I}}{1 + K_I \sqrt{I}} \quad (4)$$

The reaction rate of CO<sub>2</sub> photoreduction equation will change to be

$$-r_{CO_2} = k(T) \frac{K_I I}{1 + K_I I} \frac{P_{H_2O} P_{CO_2}}{(1 + K_1 P_{H_2O} + K_2 P_{CO_2})^2} \quad \text{or} \quad -r_{CO_2} = k(T) \frac{K_I \sqrt{I}}{1 + K_I \sqrt{I}} \frac{P_{H_2O} P_{CO_2}}{(1 + K_1 P_{H_2O} + K_2 P_{CO_2})^2} \quad (5)$$

Considering that the CO<sub>2</sub> photoreduction is driven both by the electron and hole, it is inclined to use the later formula, and further considering the Gaussian distribution of the concentrating light intensity, we will see that the  $-r_{CO_2}$  would change from the bound to the center of the catalyst disc with the light and temperature variation. At certain site, there is

$$(-r_{CO_2})_r = k(T_r) \frac{K_I \sqrt{I_r}}{1 + K_I \sqrt{I_r}} \frac{P_{H_2O} P_{CO_2}}{(1 + K_1 P_{H_2O} + K_2 P_{CO_2})^2} \quad (6)$$

Integral from the boundary to the center of the catalyst disc, and would yield a

reaction rate expressed by integral function of light and temperature. Especially, the  $1/2$  order also reflects the constraints to light intensity. With the light intensity increases, the effect of light intensity on the reaction rate will decrease gradually. Then, with the recorded parameters T, P and I, the equation with 1000W lamp as the light source here can be formulated

### Activity comparison of pure TiO<sub>2</sub> NTAs under 300 W and 1000 W Xe light

The light source in the paper uses a large power light source, which is different from 300 W or 500W Xe lamp in the major researches in the CO<sub>2</sub> photoreduction field. To build a bridge of understanding, CO<sub>2</sub> photoreduction activity under two light sources are compared. As shown in Figure S3, the main product is CH<sub>4</sub> under the two light resources. The CH<sub>4</sub> yield on the pure TiO<sub>2</sub> NTAs is about  $1.26 \mu\text{mol} \cdot \text{g}^{-1}$  after 5 h reaction, which is not very good, but still lines in the normal value range of reported results. Meanwhile, under 1000 W Xe lamp, the yield increases to about  $74 \mu\text{mol} \cdot \text{g}^{-1}$  after 5 h reaction. Compared with the result under 300 W Xe lamp, it has a clear increment.

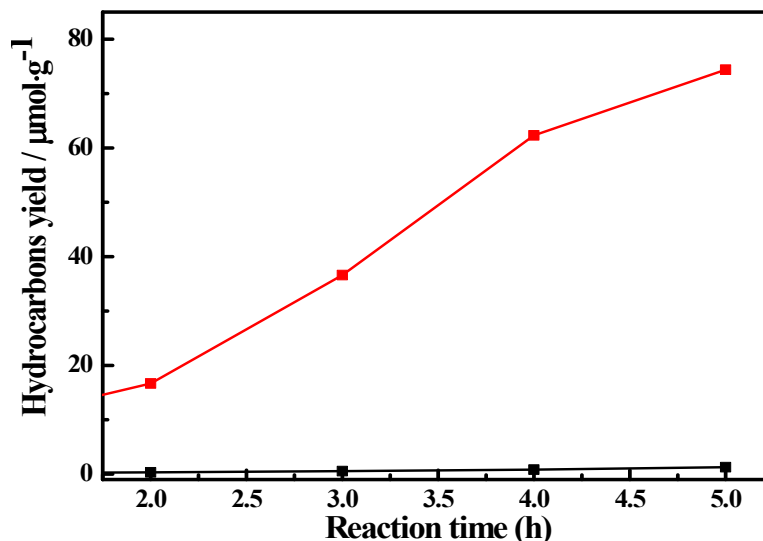

Figure S6 Hydrocarbons yield of pure TiO<sub>2</sub> NTAs catalyst under 300 W and 1000 W Xe lamp. (Initial CO<sub>2</sub> pressure 0.1 MPa; initial amount of H<sub>2</sub>O 0.5 mL)

Table S2 Collected activity data under concentrating solar light

| Catalysts                                             | Light<br>source    | Reducing<br>agent | Concentration<br>ratio | Reaction<br>parameters | Main<br>product               | Reaction rate/<br>$\mu\text{mol}\cdot\text{g}^{-1}\cdot\text{h}^{-1}$ |
|-------------------------------------------------------|--------------------|-------------------|------------------------|------------------------|-------------------------------|-----------------------------------------------------------------------|
| (Ni, Fe)- N- C<br>DSAC [13]                           | Xe lamp            | H <sub>2</sub> O  | 10                     | Liquid phase           | CH <sub>4</sub>               | 135.35                                                                |
|                                                       |                    |                   |                        | T ~ 150 °C             | CO                            | 86.16                                                                 |
|                                                       |                    |                   |                        | P ~ 0.1MPa             | CH <sub>3</sub> OH            | 59.81                                                                 |
| Bi <sub>2</sub> WO <sub>6</sub> /WO <sub>3</sub> [14] | Nature<br>sunlight | H <sub>2</sub> O  | 600                    | Gas phase              | CH <sub>4</sub>               | 304.94                                                                |
|                                                       |                    |                   |                        | T ~ 400 °C             | C <sub>2</sub> H <sub>4</sub> | 62.70                                                                 |
|                                                       |                    |                   |                        | P ~ 1.1MPa             | C <sub>2</sub> H <sub>6</sub> | 54.66                                                                 |
| TiO <sub>2</sub> nanotube<br>arrays[15]               | Nature<br>sunlight | H <sub>2</sub> O  | 800                    | Gas phase              | CH <sub>4</sub>               | 861.1                                                                 |
|                                                       |                    |                   |                        | T 330-550 °C           | C <sub>2</sub> H <sub>4</sub> | 100.8                                                                 |
|                                                       |                    |                   |                        | P 0.2-0.7<br>MPa       | C <sub>2</sub> H <sub>6</sub> | 53.3                                                                  |
| Fe <sub>2</sub> O <sub>3</sub> [16]                   | Nature<br>sunlight | H <sub>2</sub> O  | 600                    | Gas phase              | CH <sub>4</sub>               | 1281.11                                                               |
|                                                       |                    |                   |                        | T ~ 560 °C             | C <sub>2</sub> H <sub>4</sub> | 85.46                                                                 |
|                                                       |                    |                   |                        | P ~ 1.1MPa             | C <sub>2</sub> H <sub>6</sub> | 55.08                                                                 |
| P25[17]                                               | Nature<br>sunlight | H <sub>2</sub> O  | 800                    | Gas phase              | CH <sub>4</sub>               | 3157.2                                                                |
|                                                       |                    |                   |                        | T ~ 500 °C             | C <sub>2</sub> H <sub>4</sub> | 511.6                                                                 |
|                                                       |                    |                   |                        | P ~ 1.1 MPa            | C <sub>2</sub> H <sub>6</sub> | 1346.0                                                                |

1. Feng, Xinjian; Sloppy, Jennifer D.; LaTemp, Thomas J.; Paulose, Maggie; Komarneni, Sridhar; Bao, Ningzhong; Grimes, Craig A. Synthesis and deposition of ultrafine Pt nanoparticles within high aspect ratio TiO<sub>2</sub> nanotube arrays: application to the photocatalytic reduction of carbon dioxide, J Mater. Chem, 21(2011)13429-3433.
2. Li, Xin; Liu, Haoliang; Luo, Deliang; Li, Jingtian; Huang, Ying; Li, Huiling; Fang, Yueping; Xu, Yuehua; Zhu, Li, Adsorption of CO<sub>2</sub> on heterostructure CdS(Bi<sub>2</sub>S<sub>3</sub>)/TiO<sub>2</sub> nanotube photocatalysts and their photocatalytic activities in the reduction of CO<sub>2</sub> to methanol under visible light irradiation, Chem. Eng. J., 180(2012)151-158
3. Ping, Guangxing; Wang, Chao; Chen, Da; Liu, Shu; Huang, Xiani; Qin, Laishun; Huang, Yuexiang; Shu, Kangying, Fabrication of self-organized TiO<sub>2</sub> nanotube arrays for photocatalytic reduction of CO<sub>2</sub>, J. Solid Stat. Elec., 17(2013)2503-2510
4. Lu, Dandan; Zhang, Min; Zhang, Zhihua; Li, Qiuye; Wang, Xiaodong; Yang, Jianjun, Self-organized vanadium and nitrogen co-doped titania nanotube arrays with enhanced photocatalytic reduction of CO<sub>2</sub> into CH<sub>4</sub>, Nano. Res. Lett. 9(2014)272
5. Zhang, Liqiang; Cao, Huazhen; Pen, Qiuyuan; Wu, Liankui; Hou, Guangya; Tang, Yiping; Zheng, Guoqu, Embedded CuO nanoparticles@TiO<sub>2</sub>-nanotube arrays for photoelectrocatalytic reduction of CO<sub>2</sub> to methanol, Elec. Acta., 283(2018) 15071513
6. Kar, Piyush; Zeng, Sheng; Zhang, Yun; Vahidzadeh, Ehsan; Manuel, Ajay;

- Kisslinger, Ryan; Alam, Kazi M.; Thakur, Ujwal K.; Mahdi, Najia; Kumar, Pawan; Shankar, Karthik, High rate CO<sub>2</sub> photoreduction using flame annealed TiO<sub>2</sub> nanotubes, *Appl. Catal. B*, 243(2019)522-536
7. Santos, Janaina S.; Fereidooni, Mohammad; Marquez, Victor; Arumugam, Malathi; Tahir, Muhammad; Praserthdam, Supareak; Praserthdam, Piyasan, Single-step fabrication of highly stable amorphous TiO<sub>2</sub> nanotubes arrays (am-TNTA) for stimulating gas-phase photoreduction of CO<sub>2</sub> to methane, *Chemosphere*, 289(2022)133170
8. Savchuk, Timofey; Gavrilin, Ilya; Konstantinova, Elizaveta; Dronov, Alexey; Volkov, Roman; Borgardt, Nickolay; Maniecki, Tomasz; Gavrilov, Sergey; Zaitsev, Vladimir, Anodic TiO<sub>2</sub> nanotube arrays for photocatalytic CO<sub>2</sub> conversion: comparative photocatalysis and EPR study, *Nanotech.*, 33(2022)55706
9. Zhang, Jiayan; Xu, Jingjing; Tao, Feifei, Interface Modification of TiO<sub>2</sub> Nanotubes by Biomass-Derived Carbon Quantum Dots for Enhanced Photocatalytic Reduction of CO<sub>2</sub>, *ACS Appl. Energy Mater.*, 4(2021) 13120-13131
10. Goto, Hayato; Masegi, Hikaru; Sadale, Shivaji B.; Noda, Kei, Intricate behaviors of gas phase CO<sub>2</sub> photoreduction in high vacuum using Cu<sub>2</sub>O-loaded TiO<sub>2</sub> nanotube arrays, *J. CO<sub>2</sub> Util.*, 59(2022) 101964
11. Alam, Kazi M.; Chaulagain, Narendra; Shahini, Ehsan; Rana, Md Masud; Garcia, John; Kumar, Navneet; Kobryn, Alexander E.; Gusarov, Sergey; Tang, Tian; Shankar, Karthik, Low bandgap carbon nitride nanoparticles incorporated in titania nanotube arrays by in situ electrophoretic anodization for photocatalytic CO<sub>2</sub> reduction, *Chem.*

Eng. J., 456(2023)141067

12. Ge, Huibin; Zhang, Bin; Liang, Haojie; Zhang, Mingwei; Fang, Kegong; Chen, Yao; Qin, Yong, Photocatalytic conversion of CO<sub>2</sub> into light olefins over TiO<sub>2</sub> nanotube confined Cu clusters with high ratio of Cu<sup>+</sup>, Appl. Catal. B, 263(2020) 118133

13. Khatun, Fatema; Abd Aziz, Azrina; Sim, Lan Ching; Monir, Minhaj Uddin, Plasmonic enhanced Au decorated TiO<sub>2</sub> nanotube arrays as a visible light active catalyst towards photocatalytic CO<sub>2</sub> conversion to CH<sub>4</sub>, J. Environ. Chem. Eng., 7(2019)103233  
14. Md. Arif Hossen, H. M. Solayman, Kah Hon Leong, Lan Ching Sim, 14. Nurashikin Yaacof, Azrina Abd Aziz, Wu Lihua, Minhaj Uddin Monir, A Comprehensive Review on Advances in TiO<sub>2</sub> Nanotube (TNT)-Based Photocatalytic CO<sub>2</sub> Reduction to Value-Added Products, Energies, 2023, 158751

14. S. Mo, X. Zhao, S. Li, L. Huang, X. Zhao, Q. Ren, M. Zhang, R. Peng, Y. Zhang, X. Zhou, Y. Fan, Q. Xie, Y. Guo, D. Ye, Y. Chen, Non-Interacting Ni and Fe Dual-Atom Pair Sites in N-Doped Carbon Catalysts for Efficient Concentrating Solar-Driven Photothermal CO<sub>2</sub> Reduction, Angew. Chem. Int. Ed., 2023, e202313868

15. Zhang, Zekai; Zhang, Ding; Lyu, Lin; Cui, Guokai; Lu, Hanfeng, In Situ Formation of Z-Scheme Bi<sub>2</sub>WO<sub>6</sub>/WO<sub>3</sub> Heterojunctions for Gas-Phase CO<sub>2</sub> Photoreduction with H<sub>2</sub>O by Photohydrothermal Treatment, Catalysts, 12(2022)1237

16. Zhang, Zekai; Wang, Ying; Cui, Guokai; Lu, Hanfeng; Abanades, Stephane, Remarkable CO<sub>2</sub> photoreduction activity using TiO<sub>2</sub> nanotube arrays under favorable photothermal conditions driven by concentrated solar light, Appl. Phys.

Lett.,119(2021) 123906

17. Zhang, Zekai; Gao, Zhihong; Liu, Huayan; Abanades, Stephane; Lu, Hanfeng, High Photothermally Active Fe<sub>2</sub>O<sub>3</sub> Film for CO<sub>2</sub> Photoreduction with H<sub>2</sub>O Driven by Solar Light, ACS Appl. Energy Mater., 2(2019)8376-8380
18. Fang, Xiaoxiang; Gao, Zhihong; Lu, Hanfeng; Zhang, Zekai, Boosting CO<sub>2</sub> photoreduction activity by large Fresnel lens concentrated solar light, Catal. Commun., 125(2019)48-51
